# Supplementary material for: Proficiency of the electron-deficient 1,3,5-triazine ring to generate anion–π and lone pair–π interactions
Source: Royal Society of Chemistry journal article supplement (doi:10.1039/c004478d), 2010-01-01

## Supporting Information to the paper entitled

### Proficiency of the electron-deficient 1,3,5-triazine ring to generate anion- $\pi$ and lone-pair- $\pi$ interactions

José Sánchez Costa, Adriana Gonzalez Castro, Roberta Pievo, Olivier Roubeau, Barbara Modéc, Bojan Kozlevčar, Simon J. Teat, Patrick Gamez and Jan Reedijk

#### Table of Contents

---

|                                                                                                                                                                                          |         |
|------------------------------------------------------------------------------------------------------------------------------------------------------------------------------------------|---------|
| <b>Table S1.</b> Crystal data and structure refinement details for compound <b>cspat</b>                                                                                                 | Page S2 |
| <b>Figure S1.</b> Single-crystal X-ray structure of the ligand <b>cspat</b>                                                                                                              | S3      |
| <b>Figure S2.</b> Illustration of the nitrate- $\pi$ interaction occurring in the solid-state structure of compound <b>3</b>                                                             | S3      |
| <b>Figure S3.</b> Illustrations of the anion- $\pi$ /lone pair- $\pi$ / $\pi$ -lone pair/ $\pi$ -anion supramolecular complex observed in the solid-state structure of compound <b>3</b> | S4      |

---

**Table S1** Crystal data and structure refinement details for **cspat**

|                                                      |                                    |                                      |  |
|------------------------------------------------------|------------------------------------|--------------------------------------|--|
| Empirical formula                                    | $C_{29}H_{26}Cl_1N_7S_2$           |                                      |  |
| Fw ( $g\ mol^{-1}$ )                                 | 572.14                             |                                      |  |
| Crystal system                                       | Orthorhombic                       |                                      |  |
| Space group                                          | <i>Pbnm</i>                        |                                      |  |
| Crystal colour and size                              | colourless                         | $0.16 \times 0.16 \times 0.04\ mm^3$ |  |
| Temperature (K)                                      | 293(2)                             |                                      |  |
| Unit cell parameters                                 | $a = 10.6745(2)\ \text{\AA}$       | $\alpha = 90^\circ$                  |  |
|                                                      | $b = 11.5441(2)\ \text{\AA}$       | $\beta = 90^\circ$                   |  |
|                                                      | $c = 22.9797(3)\ \text{\AA}$       | $\gamma = 90^\circ$                  |  |
| $V\ (\text{\AA}^3)$                                  | 2831.73(8)                         |                                      |  |
| $Z$                                                  | 4                                  |                                      |  |
| $\rho_{\text{calcd}}\ (\text{Mg}/\text{m}^3)$        | 1.342                              |                                      |  |
| $\mu\ (\text{mm}^{-1})$                              | 0.315                              |                                      |  |
| $F(000)$                                             | 1192                               |                                      |  |
| $\theta$ for data collection (deg)                   | 3.27 – 27.09                       |                                      |  |
| Reflections collected                                | 5896                               |                                      |  |
| Independent reflections                              | 3193 ( $R_{\text{int}} = 0.0405$ ) |                                      |  |
| Reflections with $F^2 > 2\sigma$                     | 2027                               |                                      |  |
| Data / restraints / parameters                       | 3193 / 0 / 182                     |                                      |  |
| Final $R$ indices [ $F^2 > 2\sigma$ ]                | $R_1 = 0.0504$                     | $wR_2 = 0.1215$                      |  |
| $R$ indices (all data)                               | $R_1 = 0.0953$                     | $wR_2 = 0.1393$                      |  |
| goodness of fit on $F^2$ <sup>a</sup>                | 1.062                              |                                      |  |
| largest diff. peak and hole ( $e\ \text{\AA}^{-3}$ ) | 0.229 and $-0.291$                 |                                      |  |

<sup>a</sup> Goodness-of-fit  $S = \{\sum[w(F_o^2 - F_c^2)^2]/(n - p)\}^{1/2}$ , where  $n$  is the number of reflections and  $p$  the number of parameters.

CCDC reference number 770310

**Figure S1.** ORTEP view of the single-crystal X-ray structure of the ligand 2-chloro-4,6-bis-*N*-[2-methylsulfonyl-*N*-(pyridin-2-ylmethyl)aniline]-1,3,5-triazine (**cspat**). H atoms are omitted for clarity.

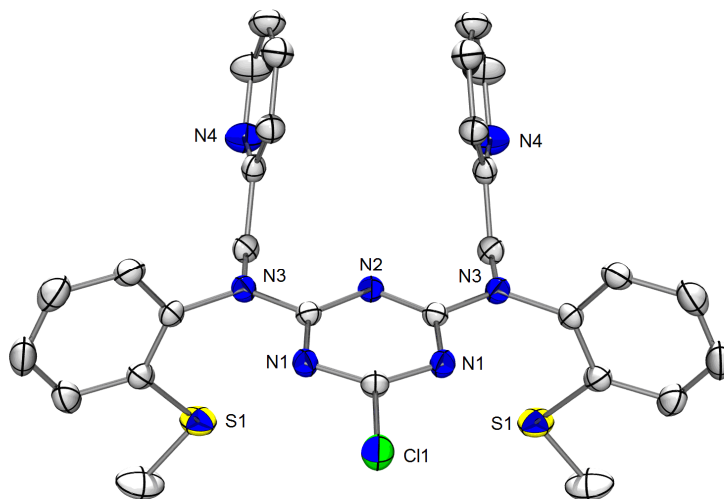

**Figure S2.** Illustration showing the close contact between the coordinated nitrate anion (oxygen atom O48) and the 1,3,5-triazine ring in **3**, characterized by a O41...triazine centroid distance of 2.940(5) Å. The N26–H26...O53 hydrogen bond distance is 2.630(4) Å and the angle N26–H26–O53 is 167.00°.

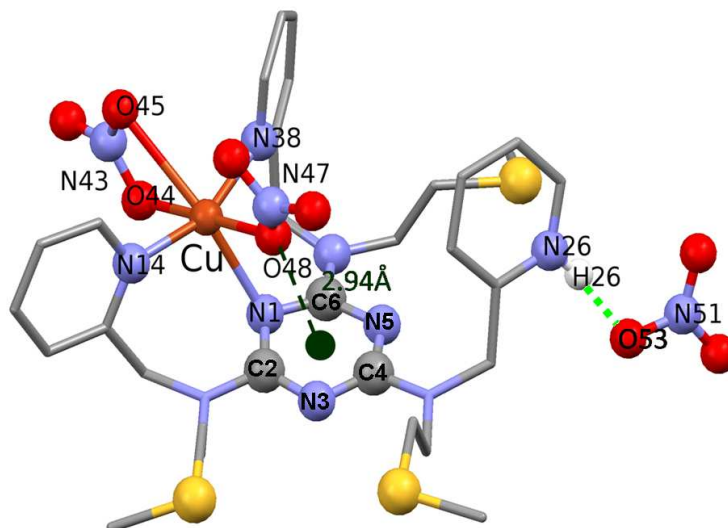

**Figure S3.** A) Scheme illustrating the supramolecular dimerization through double lone pair- $\pi$  contacts; **B** and **C**) Two views (in space-filling mode) of the anion- $\pi$ /lone pair- $\pi$ / $\pi$ -lone pair/ $\pi$ -anion supramolecular association observed in the crystal structure of **3**.

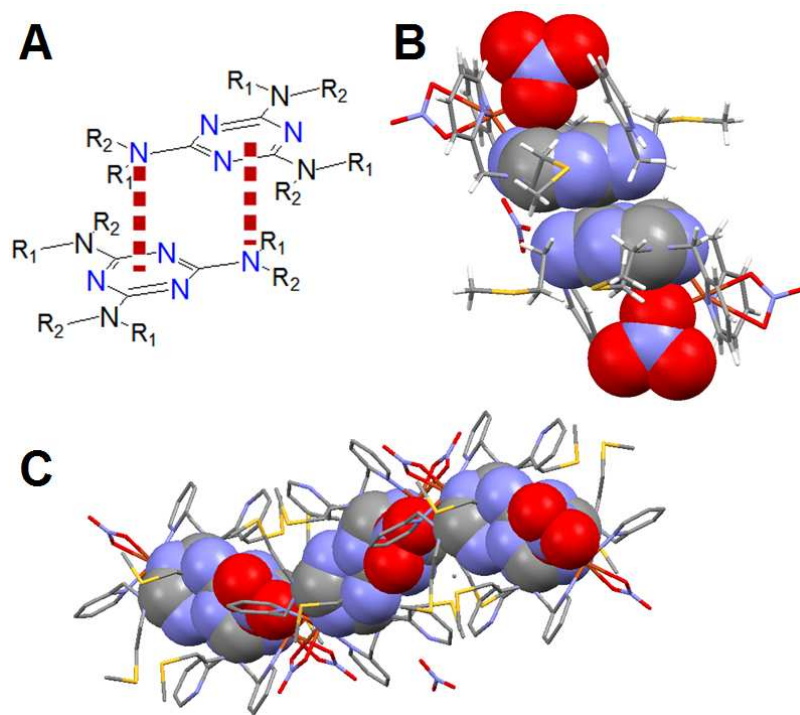

Supplement: c004478d.pdf [file c004478d.pdf]
